# Supplementary material for: Molybdenum oxide nano-dumplings with excellent stability for photothermal cancer therapy and as a controlled release hydrogel
Source: Royal Society of Chemistry journal article supplement (doi:10.1039/c9nj03088c), 2019-01-01
Supplement: c9nj03088c1.pdf [file c9nj03088c1.pdf]

## Electronic Supplementary Information

### **Molybdenum oxide nano-dumplings with excellent stability for photothermal therapy of cancer and controlled release hydrogel**

Haiyao Yang <sup>1</sup>, Yanxian Guo <sup>1</sup>, Zhengfei Zhuang<sup>1</sup>, Huiqing Zhong<sup>1</sup>, Chaofan Hu <sup>\*2</sup>, Zhiming Liu <sup>\*1</sup>, Zhouyi Guo <sup>\*1</sup>

<sup>1</sup> South China Normal University, College of Biophotonics, MOE Key Laboratory of Laser Life Science & SATCM

Third Grade Laboratory of Chinese Medicine and Photonics Technology, Guangzhou 510631, China.

E-mail: [liuzm@scnu.edu.cn](mailto:liuzm@scnu.edu.cn), [ann@scnu.edu.cn](mailto:ann@scnu.edu.cn)

<sup>1</sup> South China Agricultural University, College of Materials and Energy, Guangzhou 510642, Guangdong, China.

E-mail: [thucf@scau.edu.cn](mailto:thucf@scau.edu.cn)

---

<sup>1</sup> South China Normal University, College of Biophotonics, MOE Key Laboratory of Laser Life Science & SATCM  
Third Grade Laboratory of Chinese Medicine and Photonics Technology, Guangzhou 510631, China.

E-mail: [liuzm@scnu.edu.cn](mailto:liuzm@scnu.edu.cn), [ann@scnu.edu.cn](mailto:ann@scnu.edu.cn)

<sup>2</sup> South China Agricultural University, College of Materials and Energy, Guangzhou 510642, Guangdong, China.

E-mail: [thucf@scau.edu.cn](mailto:thucf@scau.edu.cn)

## Supplementary Figures

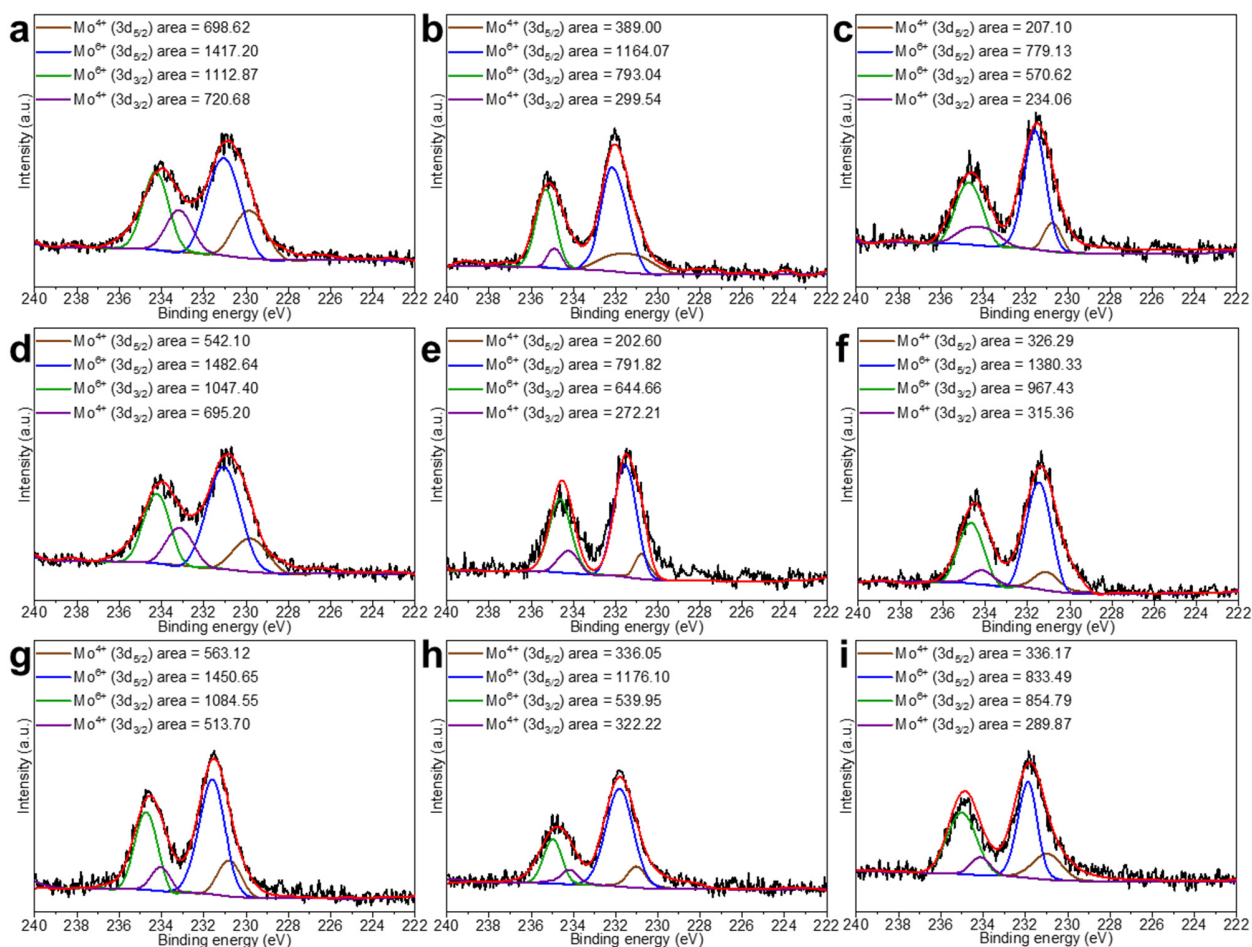

**Fig. S1** Mo 3d XPS spectra of (a) just-synthesized A-MoO, (b) 24 hours hydrochloric acid etched A-MoO, (c) 24 hours sodium hydroxide etched A-MoO, (d) 90 days settled A-MoO, A-MoO heated 24 hours at (e) 200 and (f) 300 °C, 24 hours laser irradiated A-MoO by (g) 514, (h) 808, (i) 1064 nm.

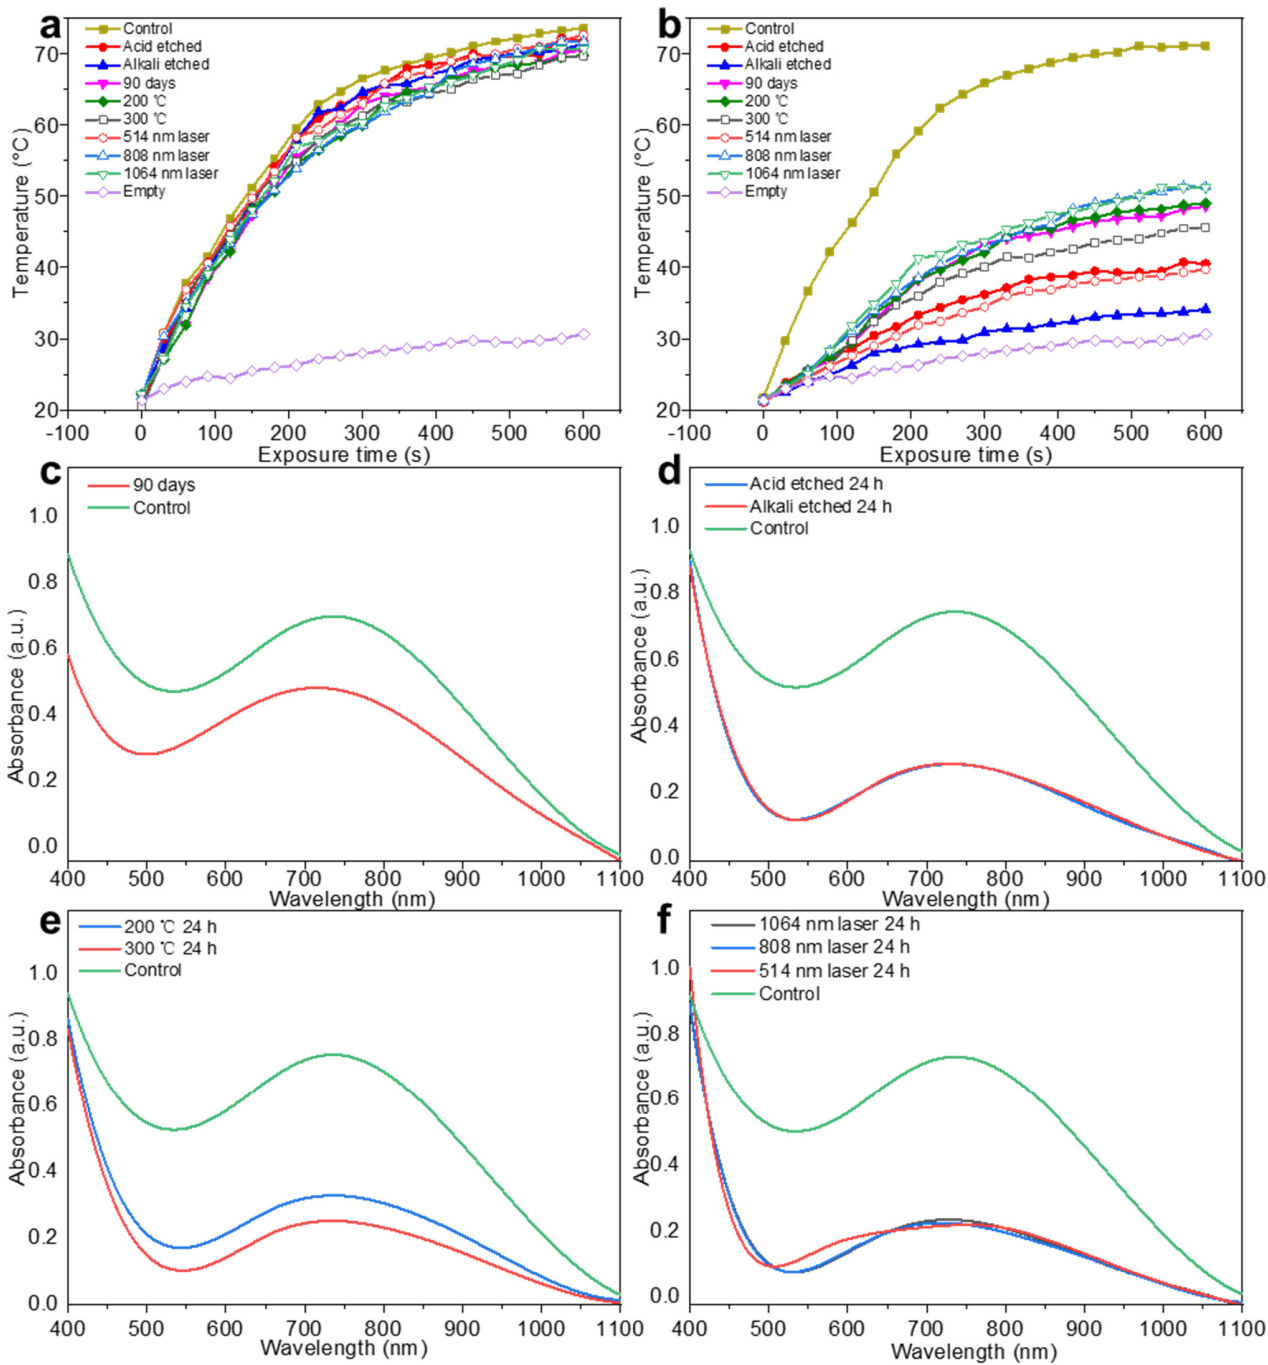

**Fig. S2** (a) Temperature elevation of MoO<sub>2.63</sub> aqueous dispersion (1 mg/mL) after different treatment under the irradiation of 808 nm laser (2 W/cm<sup>2</sup>). (b) Temperature elevation of A-MoO aqueous dispersion (1 mg/mL) after different treatment under the irradiation of 808 nm laser (2 W/cm<sup>2</sup>). (c) Absorption spectra of just-synthesized and 90 days aged A-MoO. (d, e, f) Absorption spectra of asprepared A-MoO compared with chemical-etched, heat-treated with laser-irradiated A-MoO.
